# Supplementary material for: The role of N-glycosylation in spike antigenicity for the SARS-CoV-2 gamma variant
Source: PubMed Central journal article supplement (PMC10969516; doi:10.1093/glycob/cwad097), 2023-12-04

### C. Site N188 Batch 1

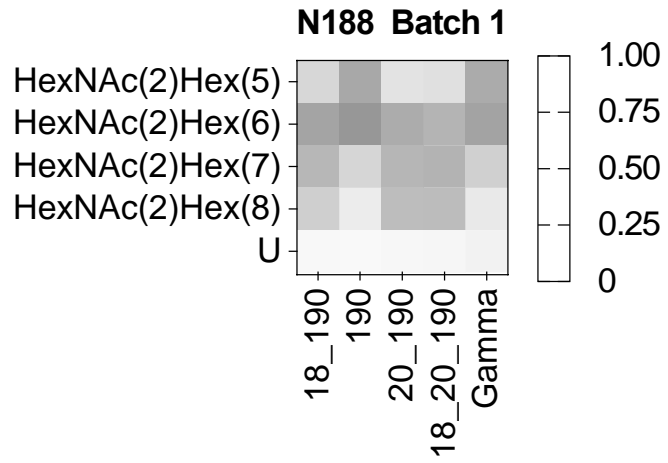

### D. Site N188 Batch 2

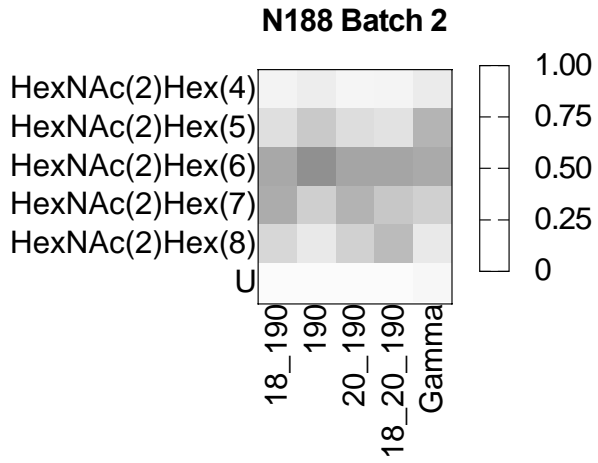

## E. Site N122 Batch 1

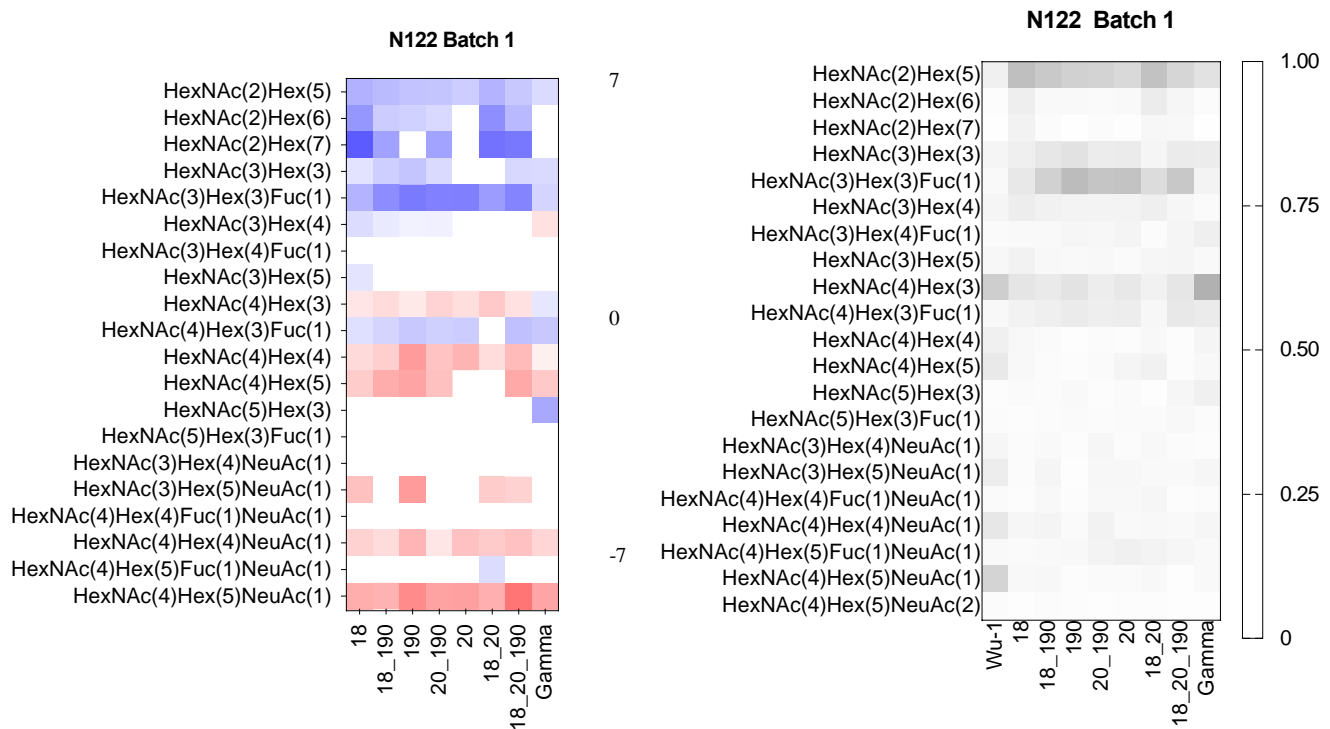

## F. Site N122 Batch 2

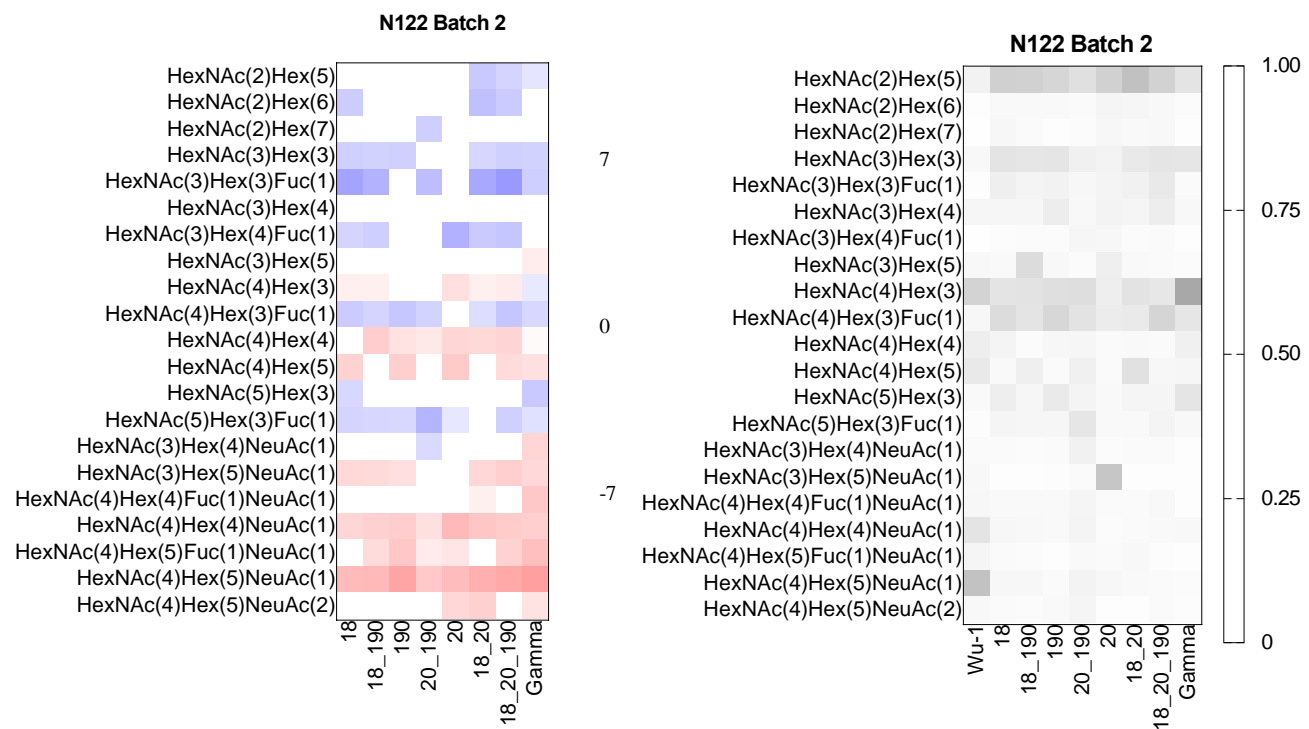

## G. Site N165 Batch 1

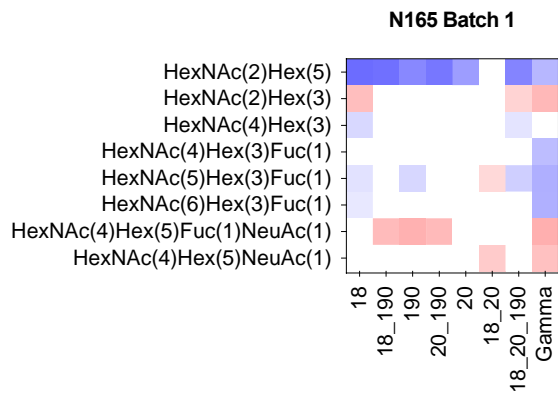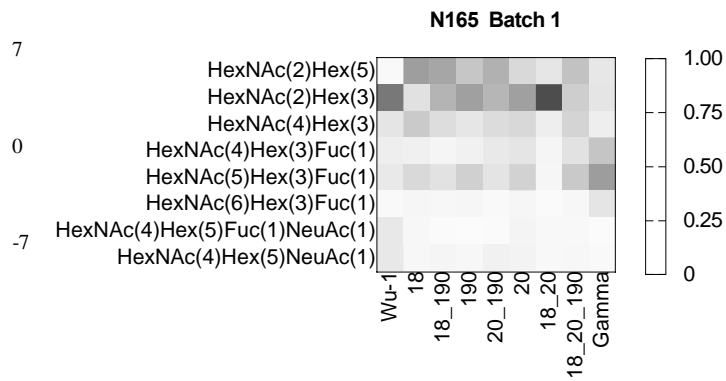

## H. Site N165 Batch 2

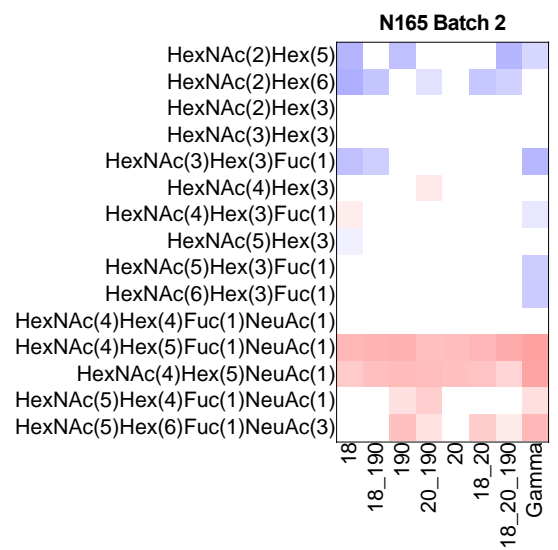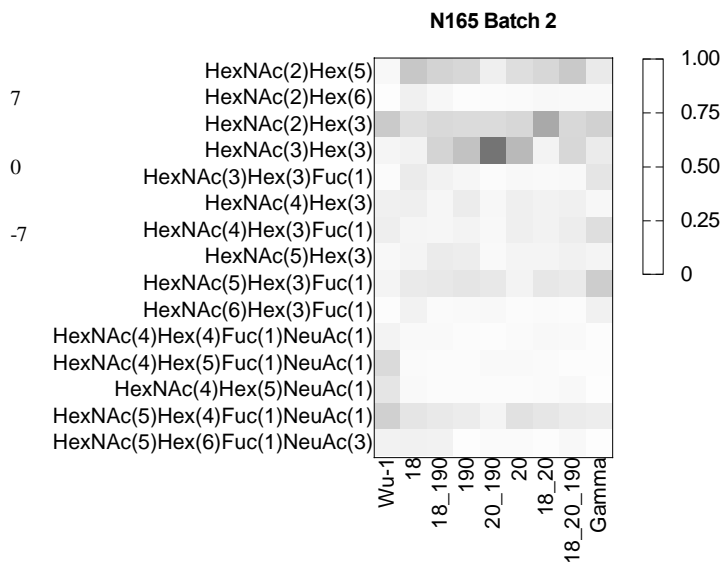

## I. Site N234 Batch 1

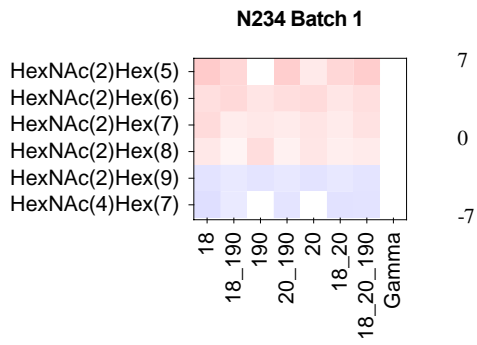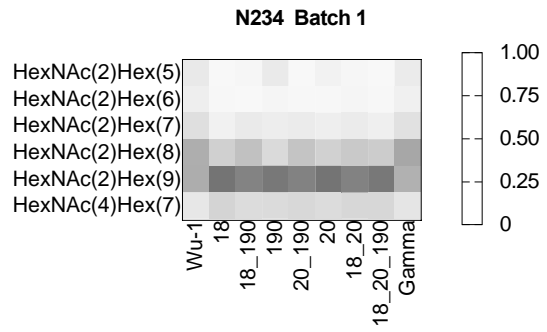

## J. Site N234 Batch 2

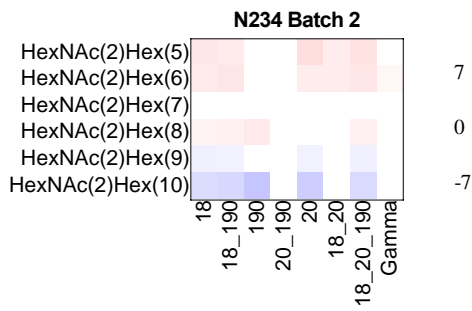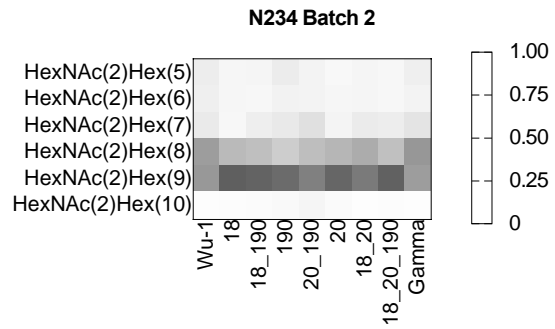

## K. Site N282 Batch 1

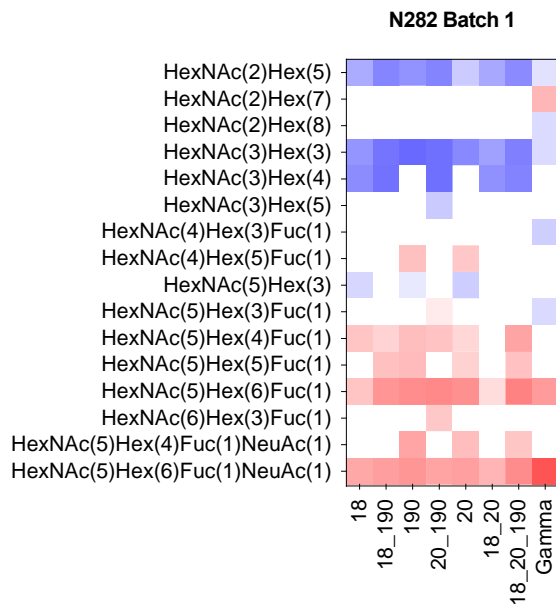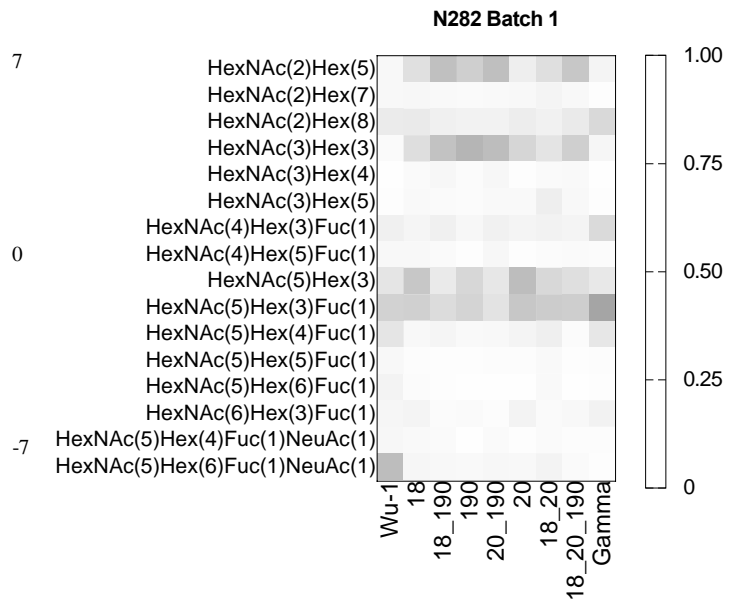

## L. Site N282 Batch 2

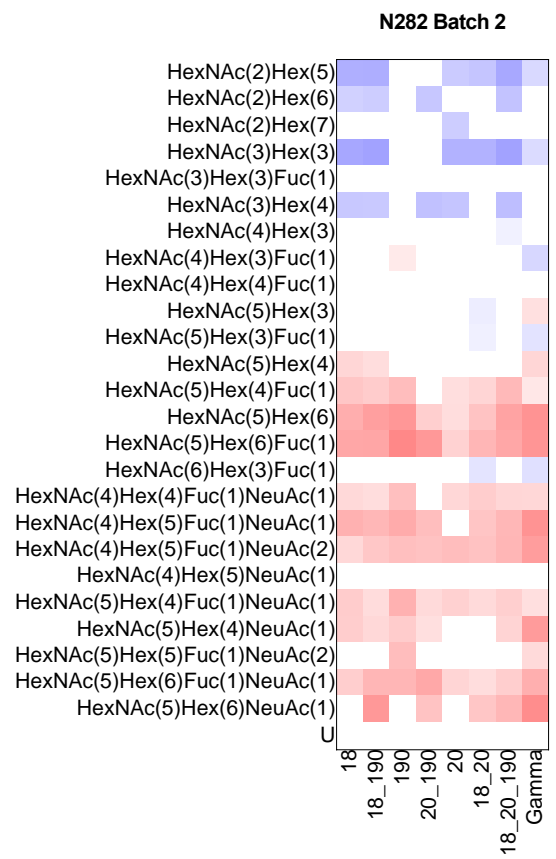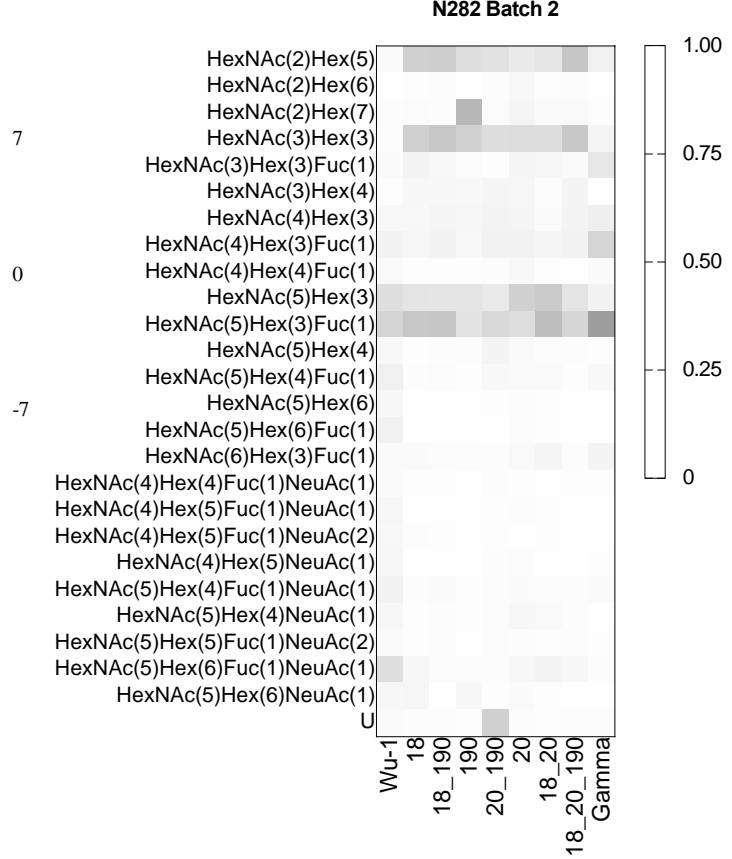

### M. Site N801 Batch 1

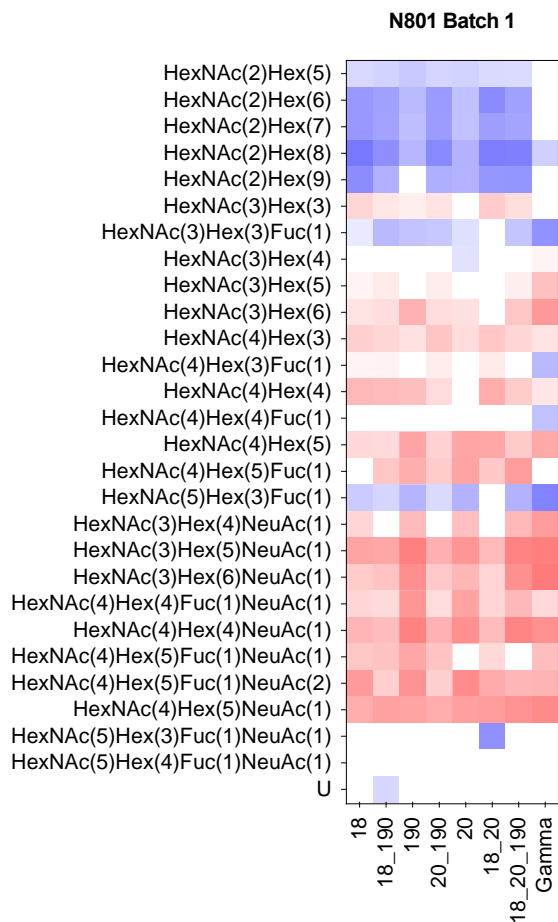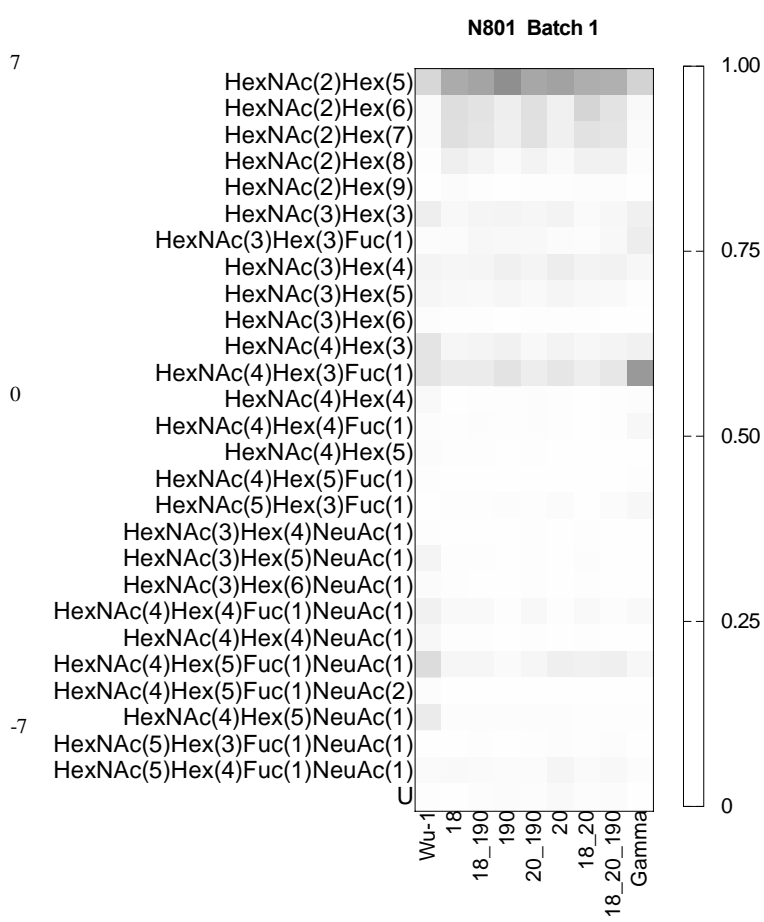

### N. Site N801 Batch 2

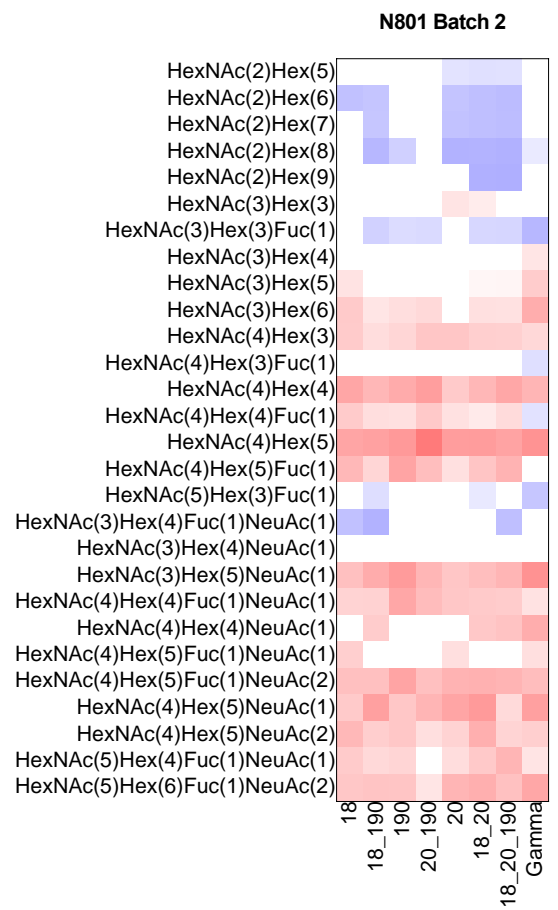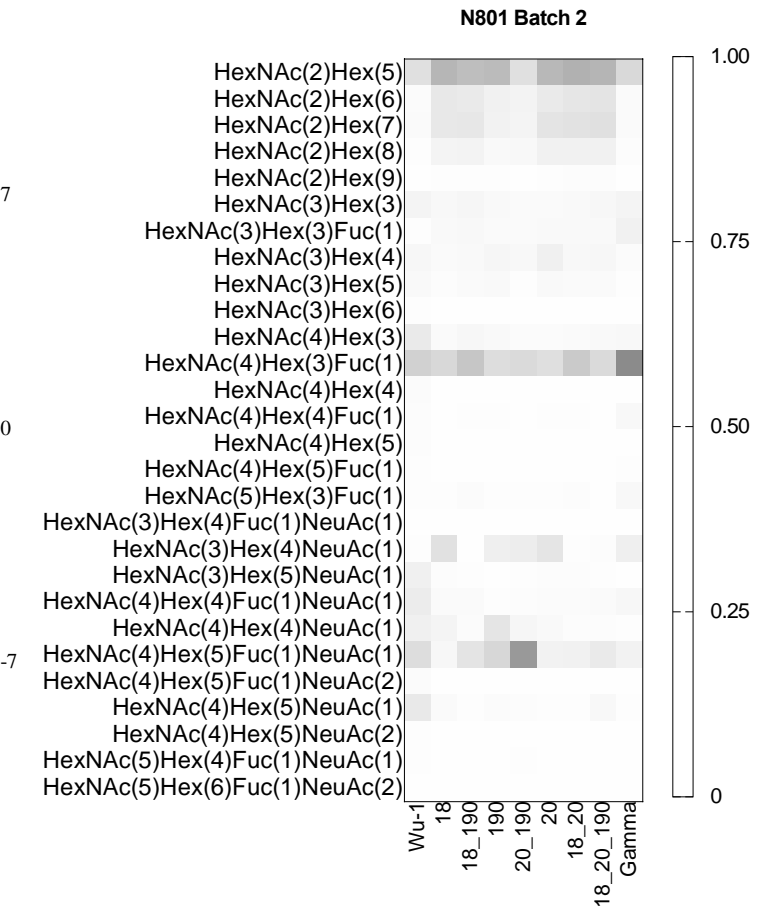



### O. Site N1098 Batch 1

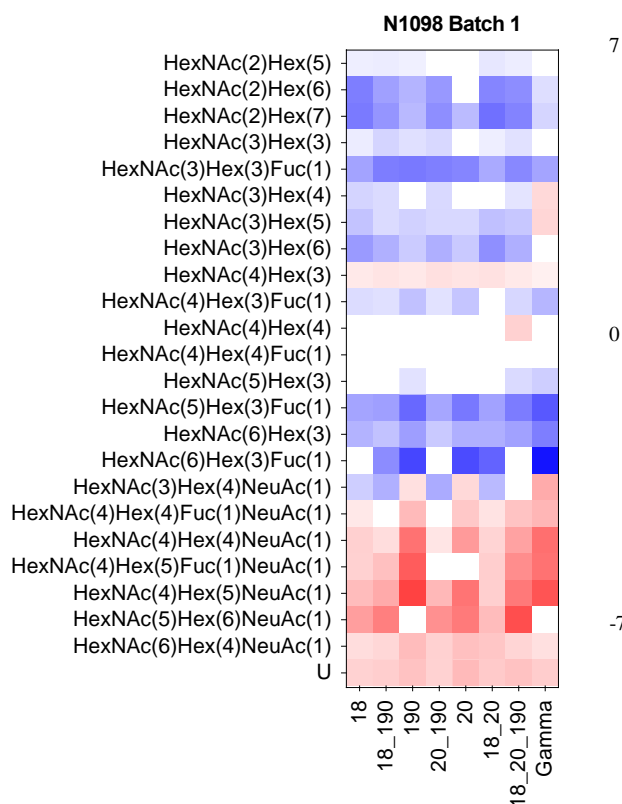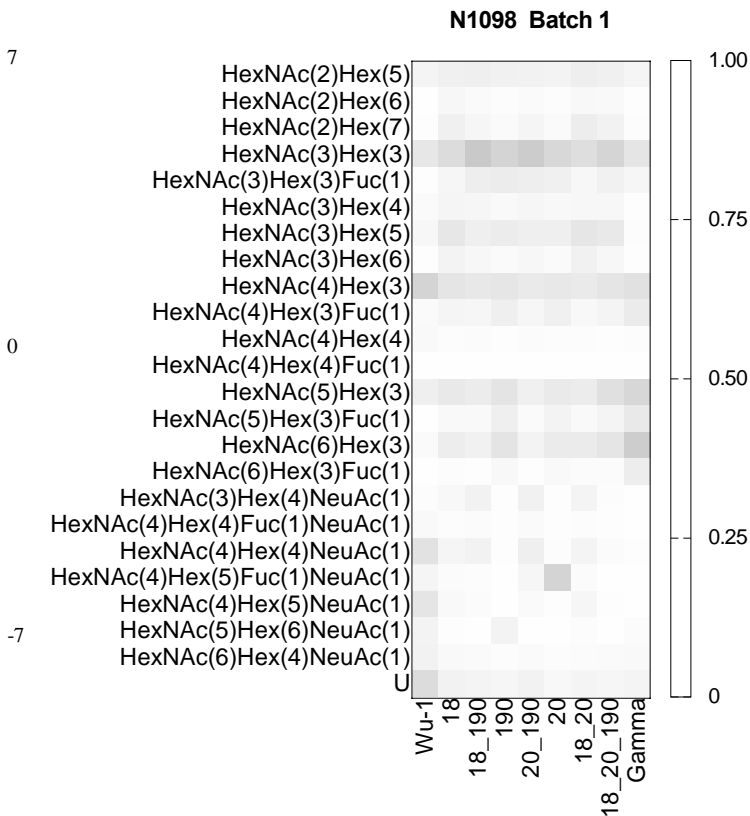

### P. Site N1098 Batch 2

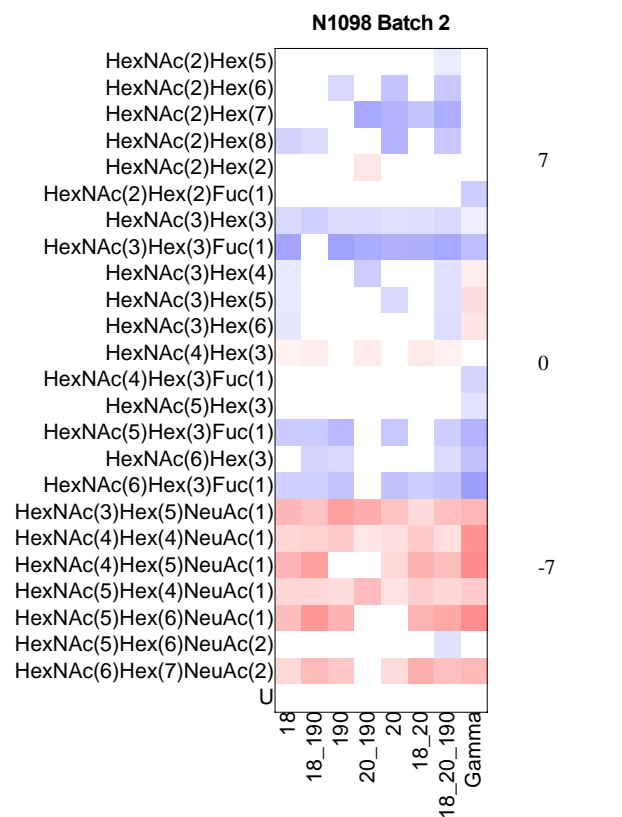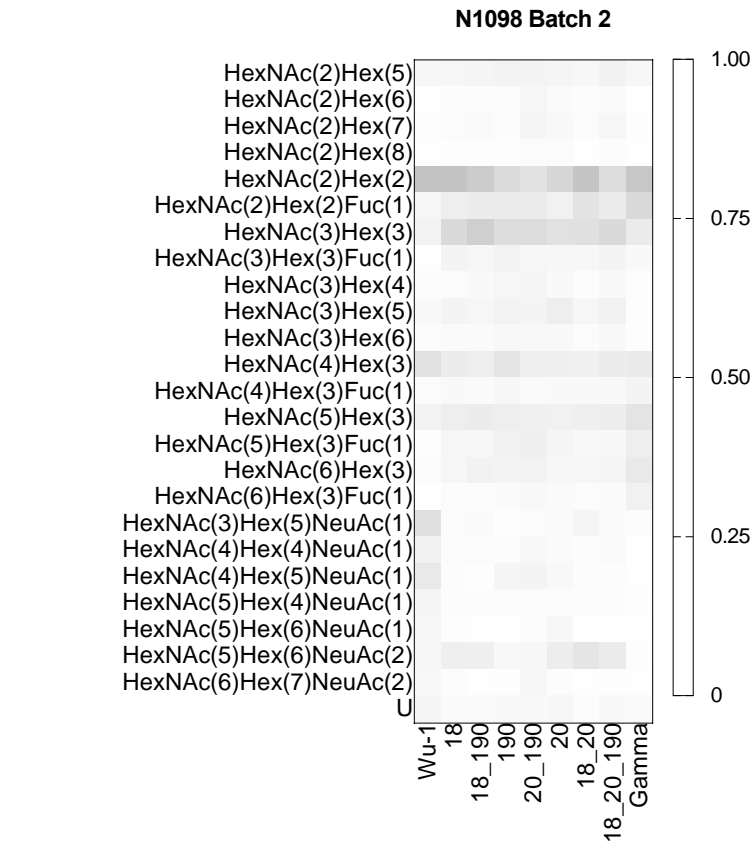

**Supplementary Figure 2.** Principal component analysis of all reliably measured *N*-linked glycoform abundances excluding N188. The proteins names 18, 20 and 190 represent the proteins with the mutations L18F, T20N and R190S, respectively.

**A. Batch 1**

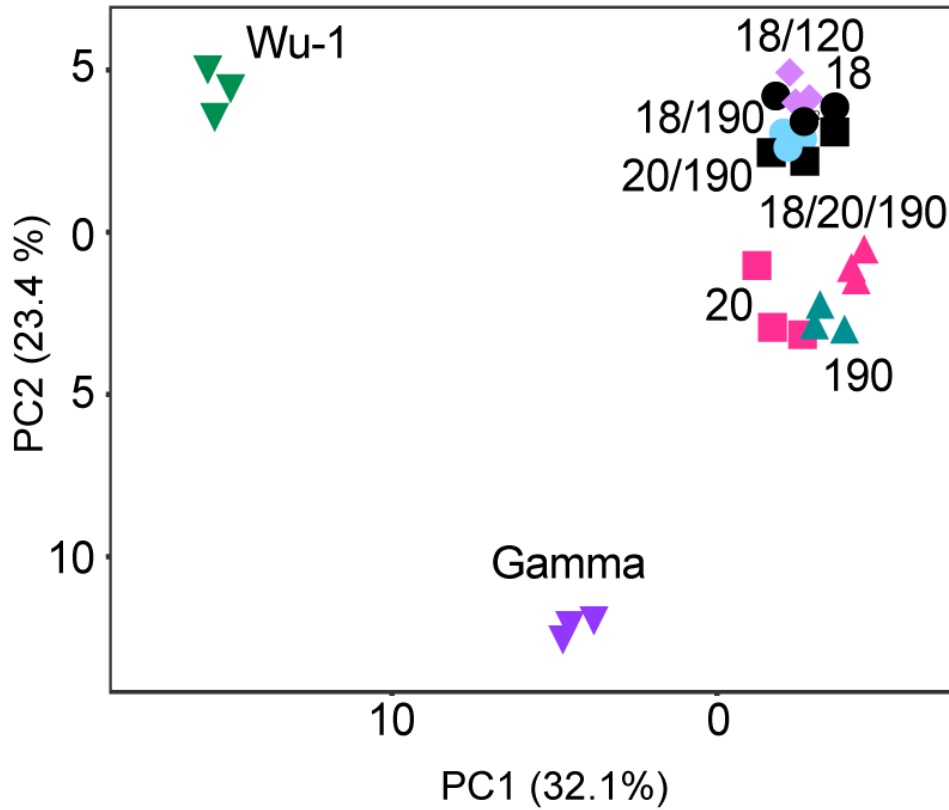

**B. Batch 2**

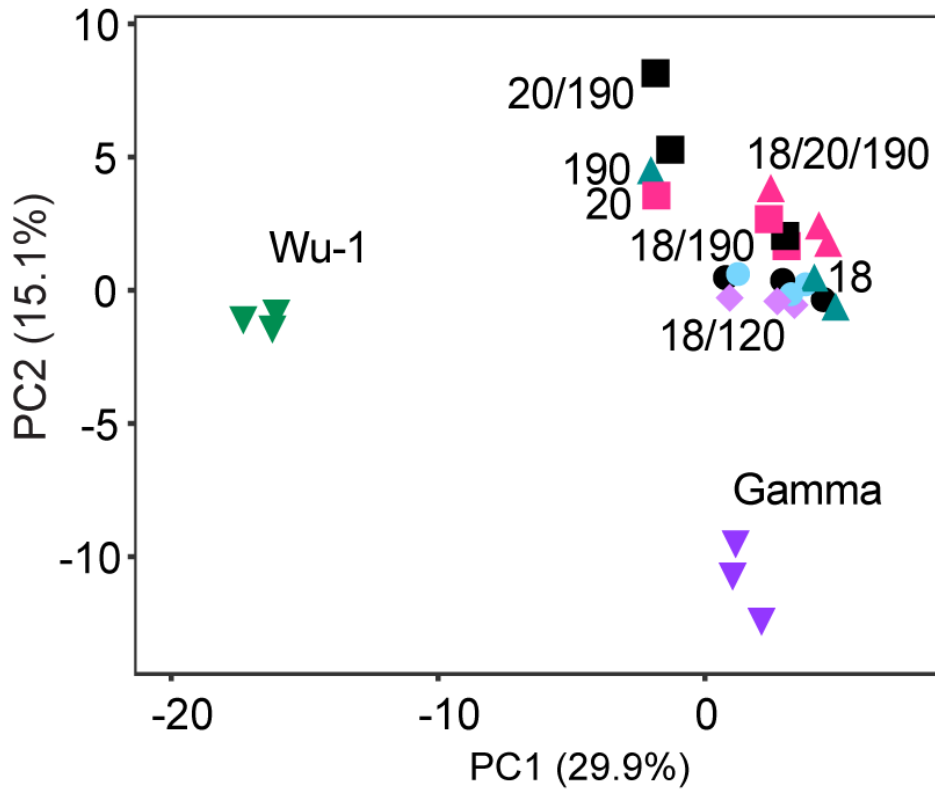

**Supplementary Figure 3.** Clustered heatmap of the relative abundance of all identified glycoforms in all replicates excluding N188. Both rows and columns were clustered using correlation distance and average linkage. The proteins names 18, 20 and 190 represent the proteins with the mutations L18F, T20N and R190S, respectively.

**A. Batch 1**

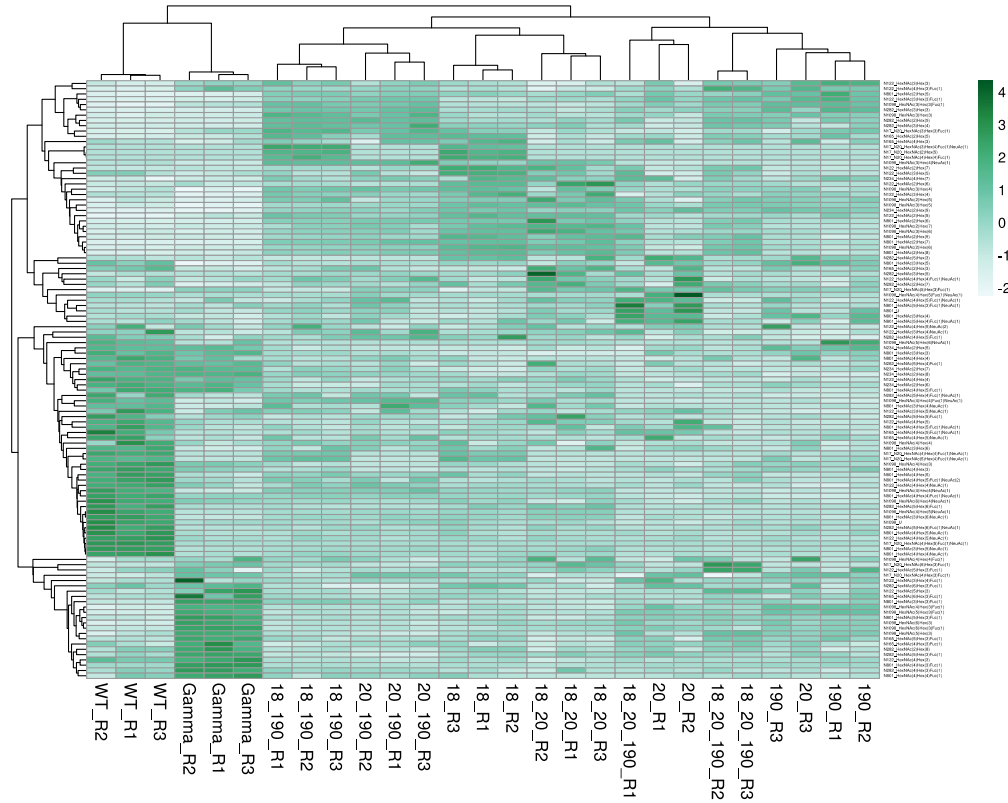

**B. Batch 2**

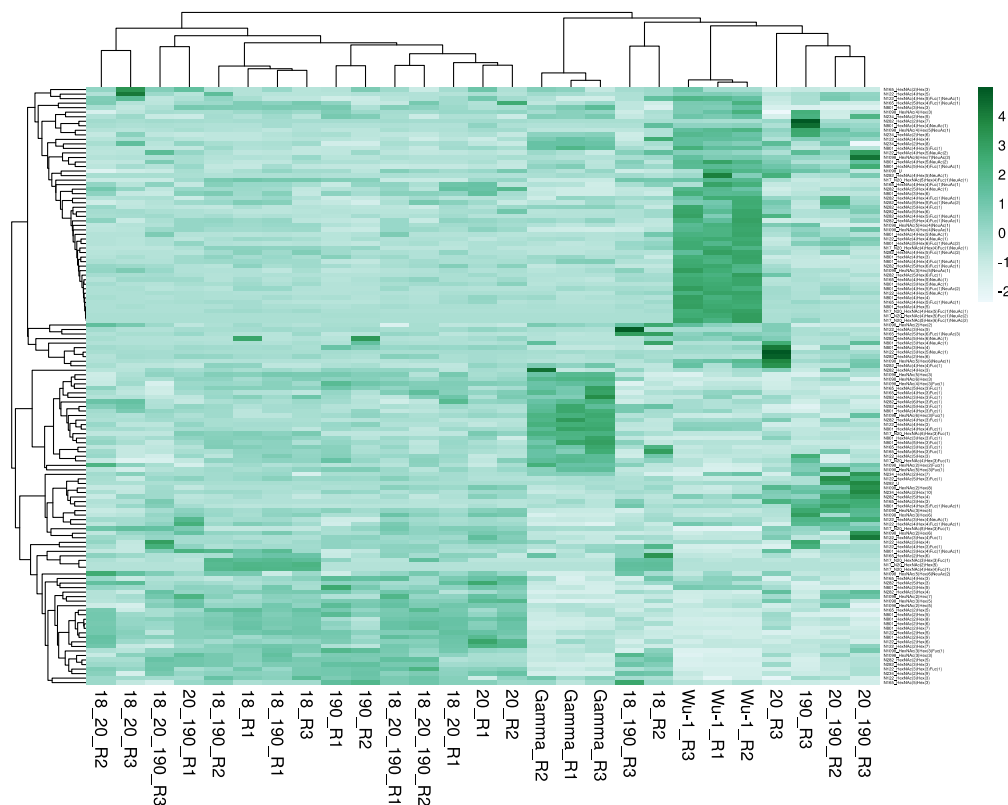

Supplement: supplementary_figures_1-3_cwad097.pdf [file supplementary_figures_1-3_cwad097.pdf]
